# Supplementary material for: Intestinal barrier regulates immune responses in the liver via IL-10–producing macrophages
Source: JCI journal article supplement (doi:10.1172/jci.insight.91980), 2018-06-20
Supplement: sd1 [file 1]

1 **Supplemental information**

2

3 **Intestinal barrier regulates immune responses in the liver via interleukin-10-producing macrophages**

4

5 Nobuhito Taniki<sup>1</sup>, Nobuhiro Nakamoto<sup>1\*</sup>, Po-Sung Chu<sup>1</sup>, Yohei Mikami<sup>1</sup>, Takeru Amiya<sup>1, 2</sup>, Toshiaki

6 Teratani<sup>1</sup>, Takahiro Suzuki,<sup>1</sup> Tomoya Tsukimi<sup>3</sup>, Shinji Fukuda<sup>3,4</sup>, Akihiro Yamaguchi<sup>1</sup>, Shunsuke Shiba<sup>1</sup>, Rei

7 Miyake<sup>1</sup>, Tadashi Katayama<sup>1</sup>, Hirotoishi Ebinuma<sup>1</sup>, and Takanori Kanai<sup>1\*</sup>

8

## Supplemental Materials and Methods

### *Experimental Protocols of $\alpha$ -Galcer-Induced Hepatitis*

$\alpha$ -Galcer was purchased from Kirin (Tokyo, Japan).  $\alpha$ -Galcer (0.1 mg/kg) were intravenously administered 24 hours before liver resection.

### *Experimental Protocols of TNBS-Induced colitis*

Mice were applied 150  $\mu$ l of the TNBS presensitization solution (Mixture of acetone/olive oil (4:1) with 5% TNBS solution, final concentration of TNBS was 1% (w/v)) to the shaved abdominal skin on day 1, control mice are treated with presensitization solution without TNBS and leaved until day 8. Anesthetize the mouse by intraperitoneal injection of 80  $\mu$ l of ketamine/xylazine solution per 10 g body weight. Mice were administered 100  $\mu$ l of TNBS solution (Mixture of absolute ethanol with 5% TNBS solution, final concentration of TNBS was 1% (w/v)) into the colon lumen using 3.5 F catheter and kept with the head down in a vertical position for 60 s on day 8; 48hr before Con A administration.

### *Measurement of serological and histological liver injury*

Serum alanine aminotransferase (ALT) levels were measured using Fuji DRI-CHEM (Fuji Film, Tokyo, Japan) according to the instructions provided by the manufacturer. Livers were fixed in 10 % formalin and embedded in paraffin. Sections were stained with H&E and examined.

### *Experimental Protocols of Terminal deoxynucleotidyl transferase-mediated deoxyuridine nick-end labeling (TUNEL) assay*

Terminal deoxynucleotidyl transferase-mediated deoxyuridine nick-end labeling staining (Chemicon International, Temecula, CA) was performed on specimens to assess apoptosis. Apoptosis was quantified by

counting positively stained cells in 5 random fields at 40<sub>×</sub> magnification. Apoptosis was measured for each specimen as a percentage of total cells per field. Antibody binding was detected by incubation with biotinylated anti-mouse immunoglobulin G antibody and visualized with a Vectastain Elite ABC Kit (Vector Laboratories, Inc) by reaction with Vectastatin DAB Substrate (Vector).

#### *Preparation of liver mononuclear cells (MCs)*

Briefly, livers were perfused through the portal vein with phosphate-buffered saline and then minced and passed through 100  $\mu\text{m}$  nylon mesh. The filtrate was centrifuged at 50  $\times$  g for 1 min, and the supernatant was washed once. Cells were suspended in a Histopaque solution (Sigma-Aldrich, St. Louis, MO, USA) and overlaid on an HBSS solution. After centrifugation at 2,500 rpm for 20 min, the cells were collected from the upper face of the Histopaque.

#### *Preparation of Intestinal lamina propria mononuclear cells (LPMCs)*

The colon was removed and placed in  $\text{Ca}^{2+}$ ,  $\text{Mg}^{2+}$ -free Hank's balanced salt solution (HBSS; Nacalai Tesque, Japan). After removal of the mesentery, the intestine was opened longitudinally, thoroughly washed in HBSS and cut into small pieces. The dissected mucosa was incubated with HBSS containing 1 mM dithiothreitol (Sigma-Aldrich, St. Louis, MO) and 5 mM EDTA (Gibco, Carlsbad, CA, USA) for 30 min at 37 °C to remove the epithelial layer. The pieces of intestine were washed and placed in digestion solution containing 1.5 % FBS, 1.0 mg/mL collagenase A (Roche Diagnostics GmbH, Germany) and 0.1 mg/mL DNase (Sigma-Aldrich, St. Louis, MO) for 1 hr at 37 °C. Intestine supernatants were washed, resuspended in 40 % Percoll and overlaid on a 75 % Percoll fraction. Percoll gradient separation was performed by centrifugation at 840  $\times$  g for 20 min at room temperature. Mononuclear cells were collected at the interphase, washed, and resuspended in FACS buffer or RPMI-1640 medium (Sigma-Aldrich) containing 10 % FBS and 1 % penicillin/streptomycin

5 (Nacalai Tesque, Japan).

#### 7 *Antimouse mAbs*

8 FITC-, PE-, APC-, Percp-, APC-Cy7-, PE-Cy7- labeled antibodies to CD3e (clone 145-2C11), CD4 (RM4-  
9 5), CD8 $\alpha$  (53-6.7), CD11b (M1/70), CD11c (HL3), Ly6C (AL-21), Ly6G (1A8), IA<sup>b</sup> (AF6-120.1), CD62L  
0 (MEL-14), CD25 (PC61), 7-AAD were purchased from BD Pharmingen. F4/80 (BM8), CCR9 (eBioCW-  
1 1.2), CSF1R (AFS98), Siglec H (551), Foxp3 (FJK-16S), NKp46 (29A1.4) were purchased from  
2 eBioscience. CLEC4F polyclonal Goat IgG antibody was purchased from R&D systems and FITC- labeled  
3 Donkey anti-Goat IgG polyclonal secondary antibody was purchased from invitrogen.

4 Background fluorescence was assessed by the irrelevant anti-rat isotype (BD Pharmingen). The stained cells  
5 were analyzed and sorted using FACS Canto II and FACS Aria (Becton Dickinson, NJ, USA), and the data  
6 were analyzed using Flowjo software (Tree star Inc., OR, USA). For intracellular cytokine staining, cells  
7 were stimulated for 4 h with lipopolysaccharide (LPS, from Escherichia coli B5, Sigma-Aldrich) in the  
8 presence of brefeldin A (10  $\mu$ g/ml) before surface staining, followed by permeabilization and intracellular  
9 staining with anti TNF (MP6-XT22) and IL-10 (JES5-16E3) mAb (BD Pharmingen). To detect IFN- $\gamma$   
0 production from CD3<sup>+</sup> T cells, hepatic MCs were stimulated with PMA (50 ng/ml) and Ionomycin (500  
1 ng/ml) for 4 h in the presence of brefeldin A (10  $\mu$ g/ml), followed by surface staining, permeabilization and  
2 intracellular staining with anti- IFN- $\gamma$  (XMG1.2) mAb (BD Pharmingen).

#### 4 *Quantitative RT-PCR (qPCR)*

5 RNA was extracted using TRIzol reagent (Invitrogen, Carlsbad, CA, USA) and cDNA was synthesized from  
6 100 ng of total RNA using TaqMan<sup>®</sup> Reverse Transcription Reagents (Applied Biosystems, Foster City, CA,  
7 USA). The level of target gene expression was normalized to the  $\beta$ -actin gene (Applied Biosystems). The

following probes were purchased from Applied Biosystems: *Actb* (01205647\_g1), *Tnf* (00443258\_m1), *Il-6* (00446190\_m1), *Il-10* (01288386\_m1), *Tgfb1* (03024053\_m1), *Irak3* (00518541\_m1), *Nnmt* (00447994\_m1)

### *In vitro proliferation assay*

CD11b<sup>+</sup>F4/80<sup>+</sup> cells from the livers of DW-Con A and DSS-Con A mice as antigen presenting cells, and CD4<sup>+</sup> CD62L<sup>+</sup> splenocytes obtained from OT-II mice as enriched naïve CD4<sup>+</sup> T cells were isolated using FACS Aria (Becton Dickinson Co. Franklin Lakes, NJ, USA). Enriched naïve CD4<sup>+</sup> T cells labeled with 1 mM Carboxyfluorescein Diacetate Succinimidyl Ester (CFSE) (Molecular Probes, Eugene, OR, USA) for 10 min at 37 °C followed by the addition of 1.0 ml of FCS for 2 min and washed three times in PBS. CFSE-labeled CD4<sup>+</sup> naïve cells (1×10<sup>5</sup> cells/well) were co-cultured with isolated macrophages (2×10<sup>4</sup> cells/well) in 96-well round-bottom plates for 72 h in the presence of OVA peptides (1 μM). After incubation, cells were collected, incubated with anti-CD4-PE-Cy7 and anti-CD3-APC-Cy7 and analyzed by flowcytometry; 7-AAD was added to exclude dead cells. Proliferation analysis is based on division times of CFSE<sup>+</sup> CD4<sup>+</sup> T cells.

### *In vitro lymphocytes stimulation with plasma*

The cells at a concentration of 3 × 10<sup>5</sup> /well were resuspended in plasma at a total volume of 100 μl in flat 96-well culture plates and incubated at 37 °C with 5 % CO<sub>2</sub> 6 hours, followed by LPS stimulation and intracellular IL-10 staining.

### *CE-TOFMS-based metabolome analysis*

Briefly, plasma metabolites were extracted by vigorous shaking with methanol containing 20 μM each of methionine sulfone and D-camphol-10-sulfonic acid as internal standards. All CE-TOFMS experiments were performed using an Agilent CE capillary electrophoresis system (Agilent Technologies), an Agilent G3250AA

1 LC/MSD TOF system (Agilent Technologies), an Agilent 1100 series binary HPLC pump, a G1603A Agilent  
2 CE-MS adapter, and a G1607A Agilent CE-ESI-MS sprayer kit. Hierarchical cluster analysis of metabolome  
3 data was performed based on Person's correlation using the Multiexperiment Viewer (MeV) version 4.9.0.  
4 Metabolite concentrations were plotted using R (version 3.1.2) along with the ggplot2 (version 2.2.1) package.

5

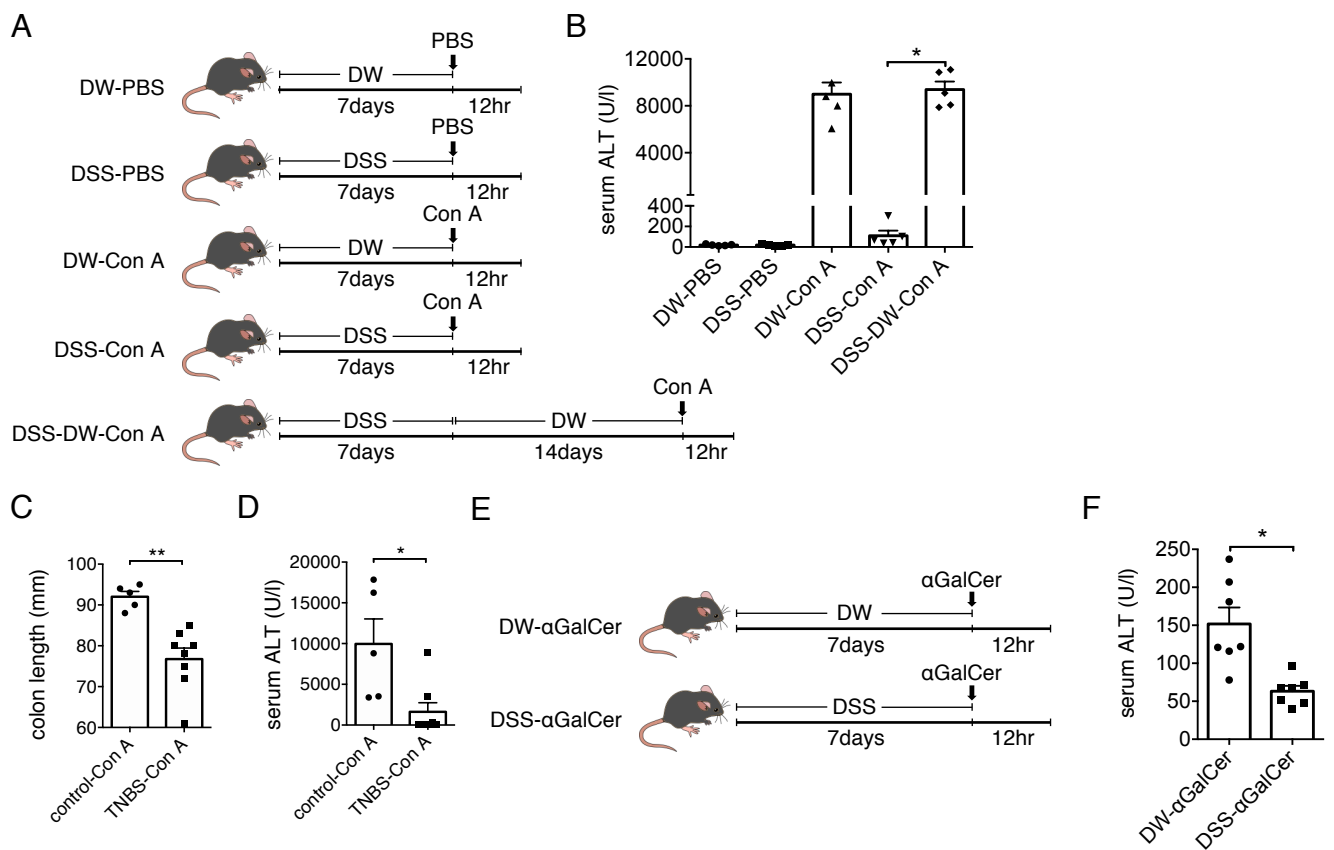

**Supplementary Figure 1. Mice recovered from DSS-induced colitis develop severe Con A-related hepatitis and tandem model of TNBS-Con A and DSS- $\alpha$ Galcer also exhibited significantly milder liver injury.** (A) DSS-DW-Con A-treated mice received DW for 3 weeks following DSS treatment, followed by Con A administration. (B) Serum ALT levels in mice from each experimental group ( $n = 5/\text{group}$ ). Data represent the mean  $\pm$  SEM. \* $P < 0.05$  according to one-way analysis of variance with Tukey's multiple-comparison correction. (C) Colon length of control-Con A or TNBS-Con A mice. (D) Serum ALT levels in mice from each experimental group ( $n = 5-8/\text{group}$ ). Data represent the mean  $\pm$  SEM. \* $P < 0.05$ , \*\* $P < 0.01$  according to one-way analysis of variance with Tukey's multiple-comparison correction. (E) Mice were either untreated or orally administered 2.0% DSS, followed by  $\alpha$ -Galcer (0.1 mg/kg) administration. (F) Serum ALT levels in mice from of each experimental group ( $n = 7/\text{group}$ ). Data represent the mean  $\pm$  SEM. \* $P < 0.05$  according to a two-tailed Student's  $t$  test.

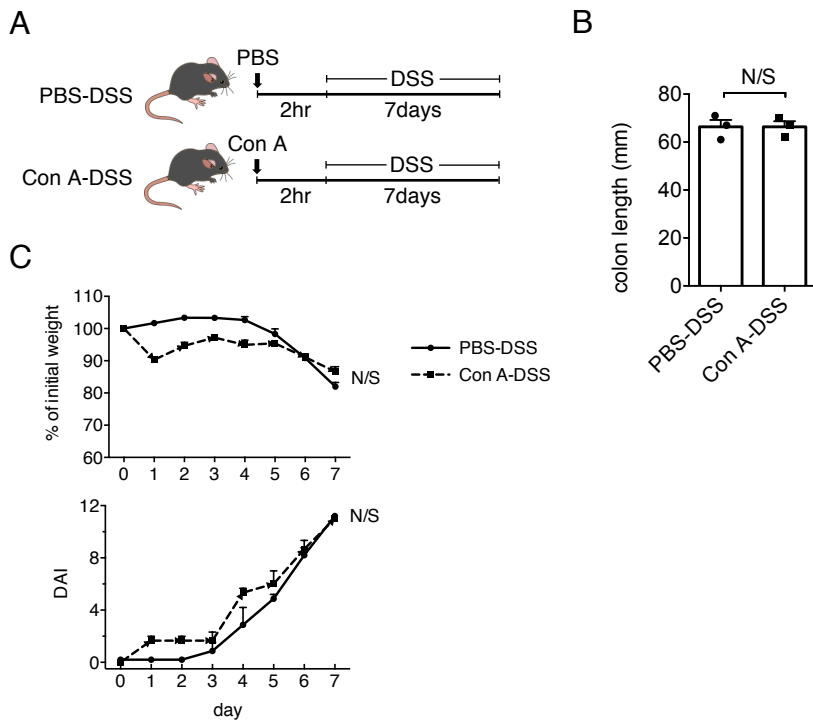

**Supplementary Figure 2. Con A pretreatment does not ablate DSS-induced colitis.** (A) Mice were administered Con A (20 mg/kg), followed by oral administration of DSS. (B) Colon length in mice from each experimental group ( $n = 3/\text{group}$ ). Data represent the mean  $\pm$  SEM. Differences were calculated according to a two-tailed Student's  $t$  test. (C) Mean body weight and DAI on days 0 to 7 in mice from each experimental group ( $n = 3/\text{group}$ ).



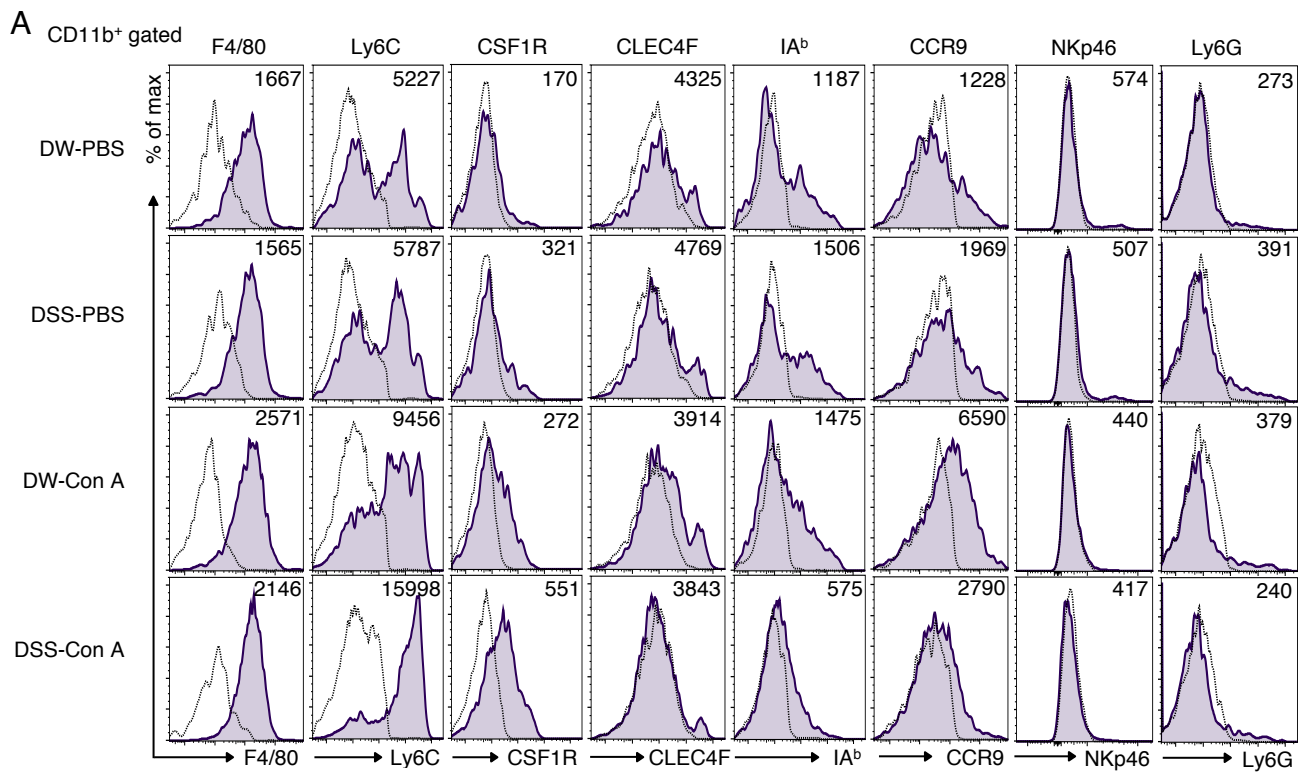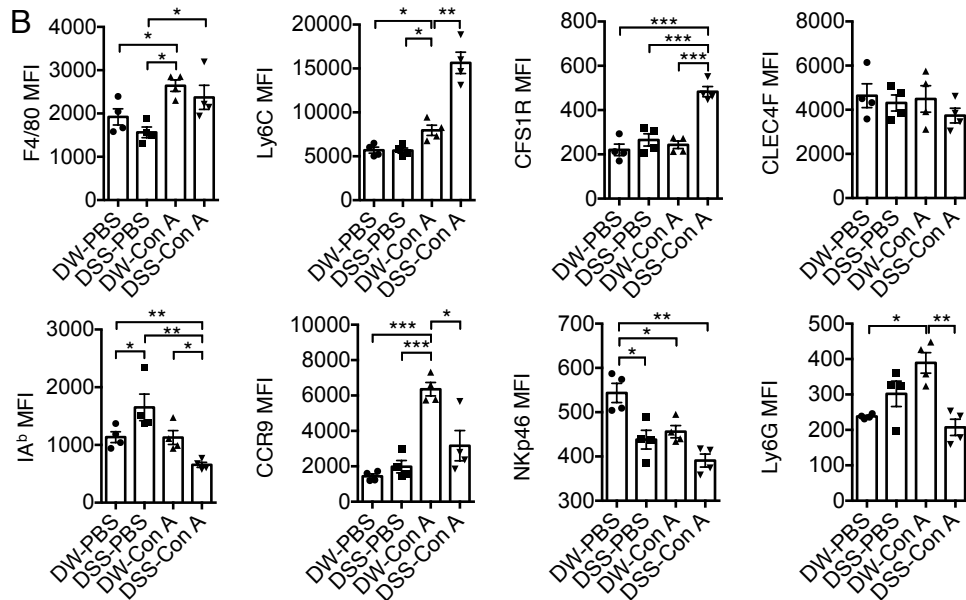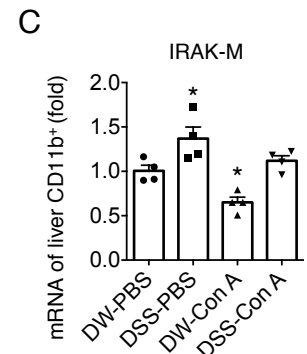

**Supplementary Figure 3. Phenotypic characteristics of DSS-Con A macrophages.** (A) Representative F4/80, Ly6C, CSF1R, IA<sup>b</sup>, CLEC4F, CCR9, NKp46 and Ly6G staining of gated CD11b<sup>+</sup> cells in the livers of mice in each experimental group. Each number indicates the mean fluorescent intensity (MFI) of each marker in CD11b<sup>+</sup> cells. (B) Mean fluorescence intensity of F4/80, Ly6C, CSF1R, CLEC4F, IA<sup>b</sup>, CCR9, NKp46 and Ly6G in gated CD11b<sup>+</sup> cells isolated from the livers of mice in each experimental group ( $n = 4/\text{group}$ ). Data represent the mean  $\pm$  SEM. \* $P < 0.05$ , \*\* $P < 0.01$ , \*\*\* $P < 0.001$  according to one-way analysis of variance with Tukey's multiple-comparison correction. (C) IRAK3 mRNA expression in CD11b<sup>+</sup> cells in the livers of mice from each experimental group ( $n = 4/\text{group}$ ). Data represent the mean  $\pm$  SEM. \* $P < 0.05$  according to one-way analysis of variance with Tukey's multiple-comparison correction compared with DW-PBS group.

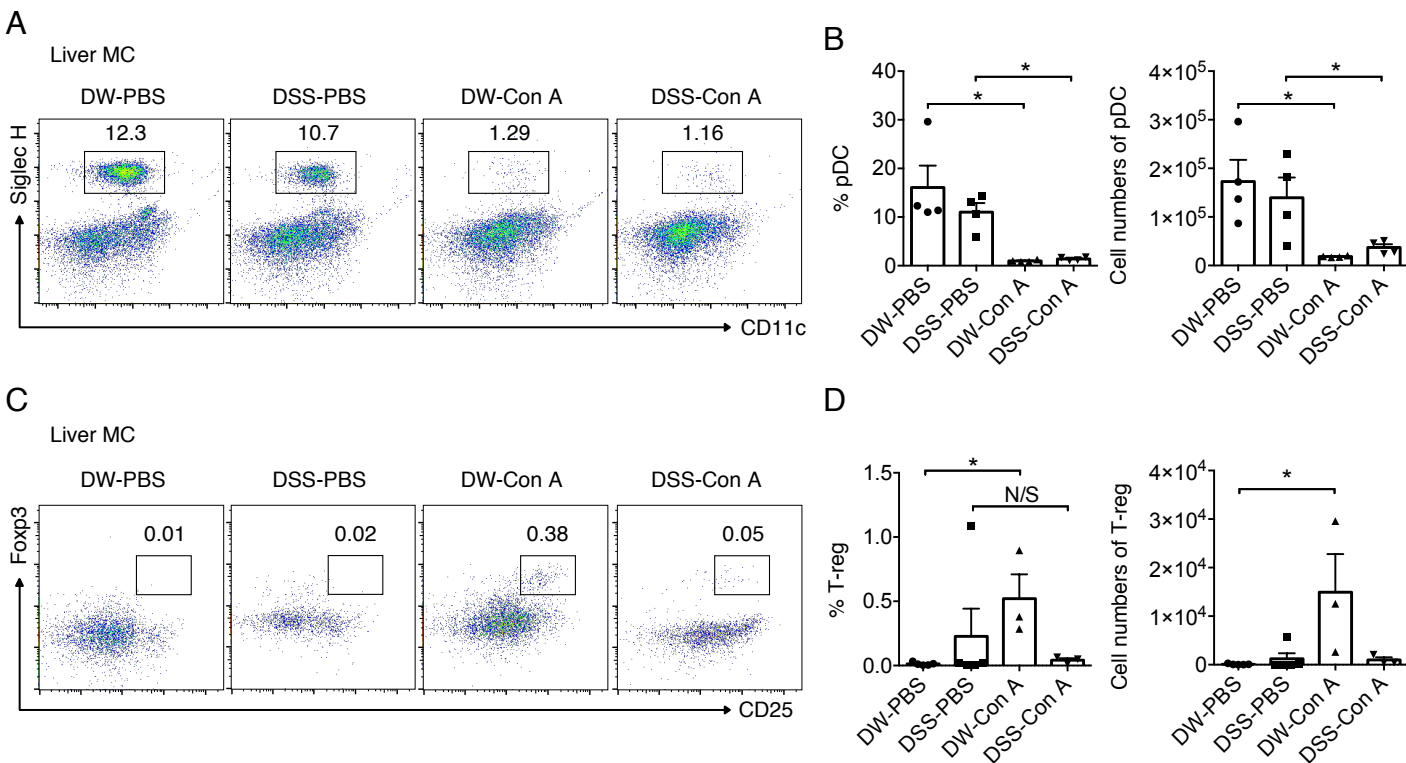

**Supplementary Figure 4. The number of pDCs and regulatory T cells are decreased in the livers of DSS-Con A-treated mice.** (A) Representative CD11c<sup>+</sup> and Siglec H<sup>+</sup> staining of whole-liver MCs isolated from mice in each experimental group. Each box and number indicates the population and the percentage of pDCs in whole-liver MCs. (B) Percentage and number of pDCs in whole-liver MCs (*n* = 4/group). (C) Representative surface CD25 and intracellular forkhead box P3 staining of whole-liver MCs isolated from each experimental group. Each box and number indicates the population and the percentage of regulatory T cells in whole-liver MCs. (D) Percentage and number of regulatory T cells in whole-liver MCs (*n* = 3–5/group). Data represent the mean ± SEM. \**P* < 0.05 according to one-way analysis of variance with Tukey’s multiple-comparison correction.

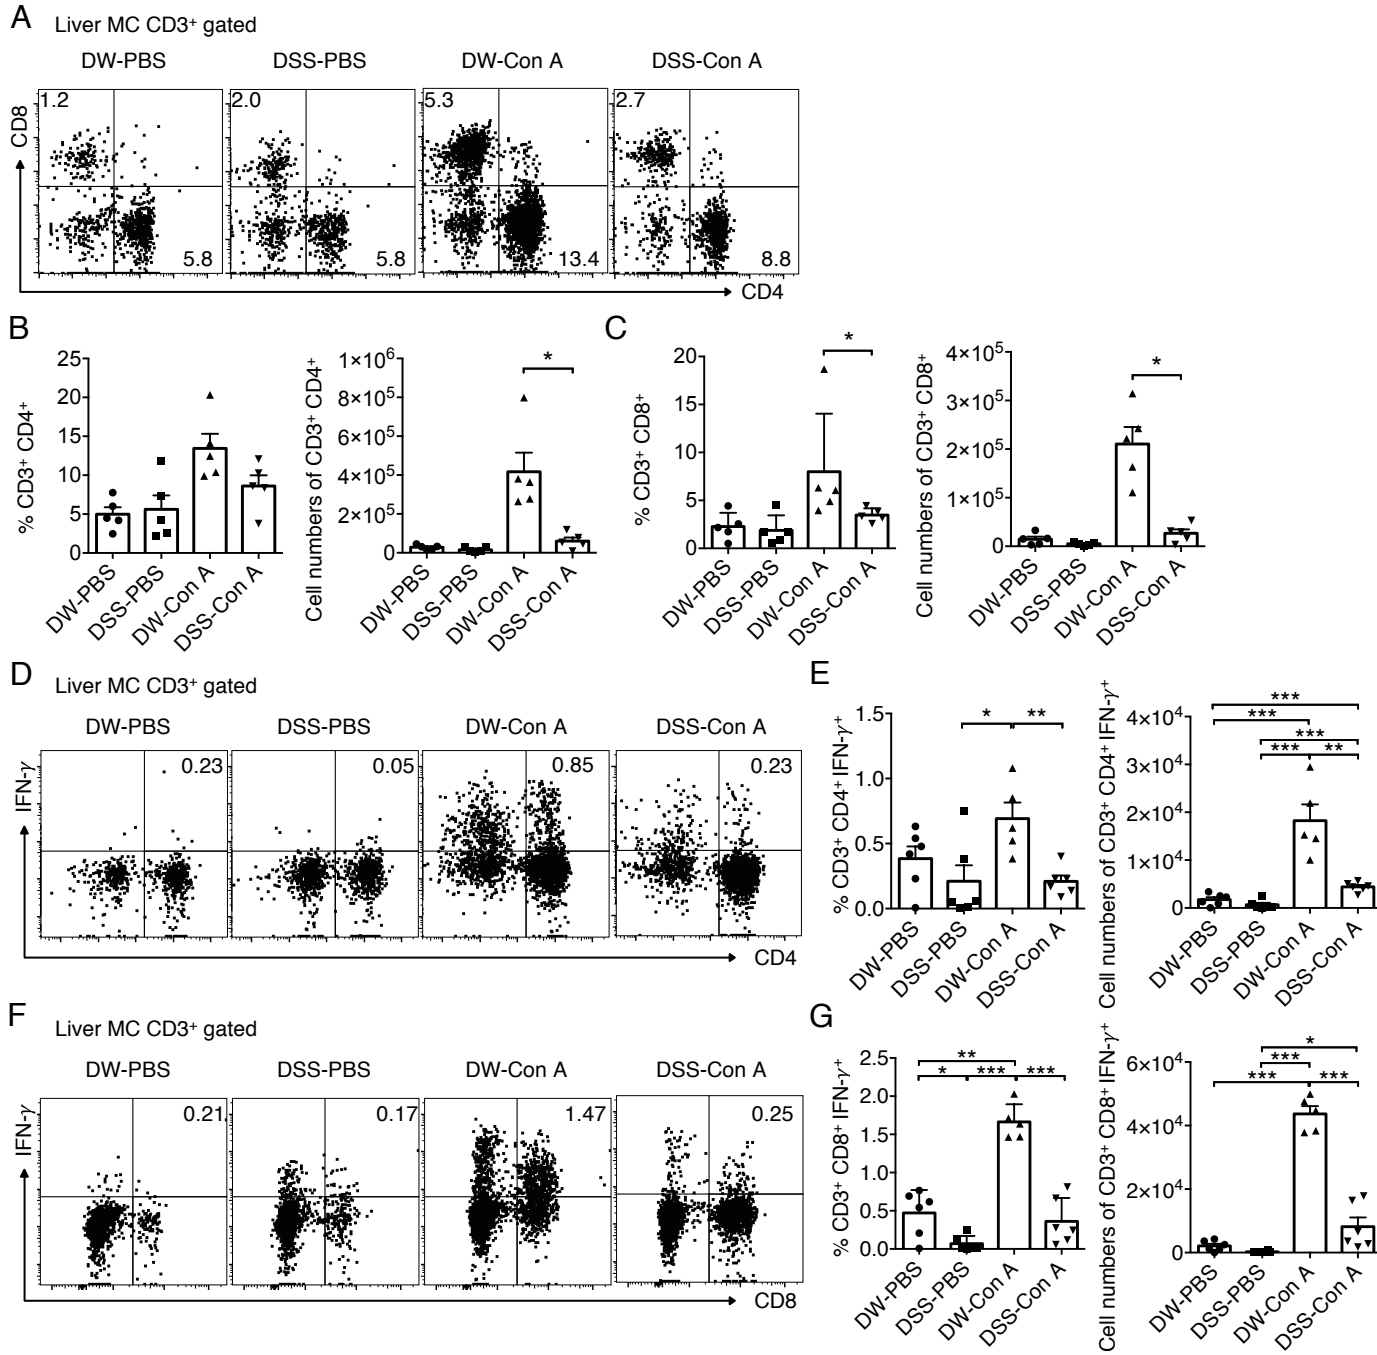

**Supplementary Figure 5**  
**Taniki et. al.**

**Supplementary Figure 5. Hepatic Th1 accumulation is attenuated following DSS-Con A treatment.** (A) Representative CD4 and CD8 staining of gated CD3<sup>+</sup> cells from mice in each experimental group. Each number indicates the percentage of positive cells in whole-liver MCs. (B) Percentage and number of CD3<sup>+</sup>CD4<sup>+</sup> cells in whole-liver MCs from mice in each experimental group ( $n = 5/\text{group}$ ). (C) Percentage and number of CD3<sup>+</sup>CD8<sup>+</sup> cells in whole-liver MCs from mice in each experimental group ( $n = 5/\text{group}$ ). (D) Representative surface CD4 and intracellular IFN- $\gamma$  staining of gated CD3<sup>+</sup> cells from mice in each experimental group after 4 h of PMA/Ionomycin stimulation. Each number indicates the percentage resident in whole liver MCs. (E) Percentage and number of CD3<sup>+</sup>CD4<sup>+</sup> IFN- $\gamma$ <sup>+</sup> cells in the livers of mice from each experimental group ( $n = 5-6/\text{group}$ ). (F) Representative surface CD8 and intracellular IFN- $\gamma$  staining of gated CD3<sup>+</sup> cells from mice in each experimental group after 4 h of PMA/Ionomycin stimulation. Each number indicates the percentage resident in whole liver MCs. (G) Percentage and number of CD3<sup>+</sup>CD8<sup>+</sup> IFN- $\gamma$ <sup>+</sup> cells in the livers of mice from each experimental group ( $n = 5-6/\text{group}$ ). Data represent the mean  $\pm$  standard error of the mean. \* $P < 0.05$ , \*\* $P < 0.01$ , \*\*\* $P < 0.001$  according to one-way analysis of variance with Tukey's multiple-comparison correction.

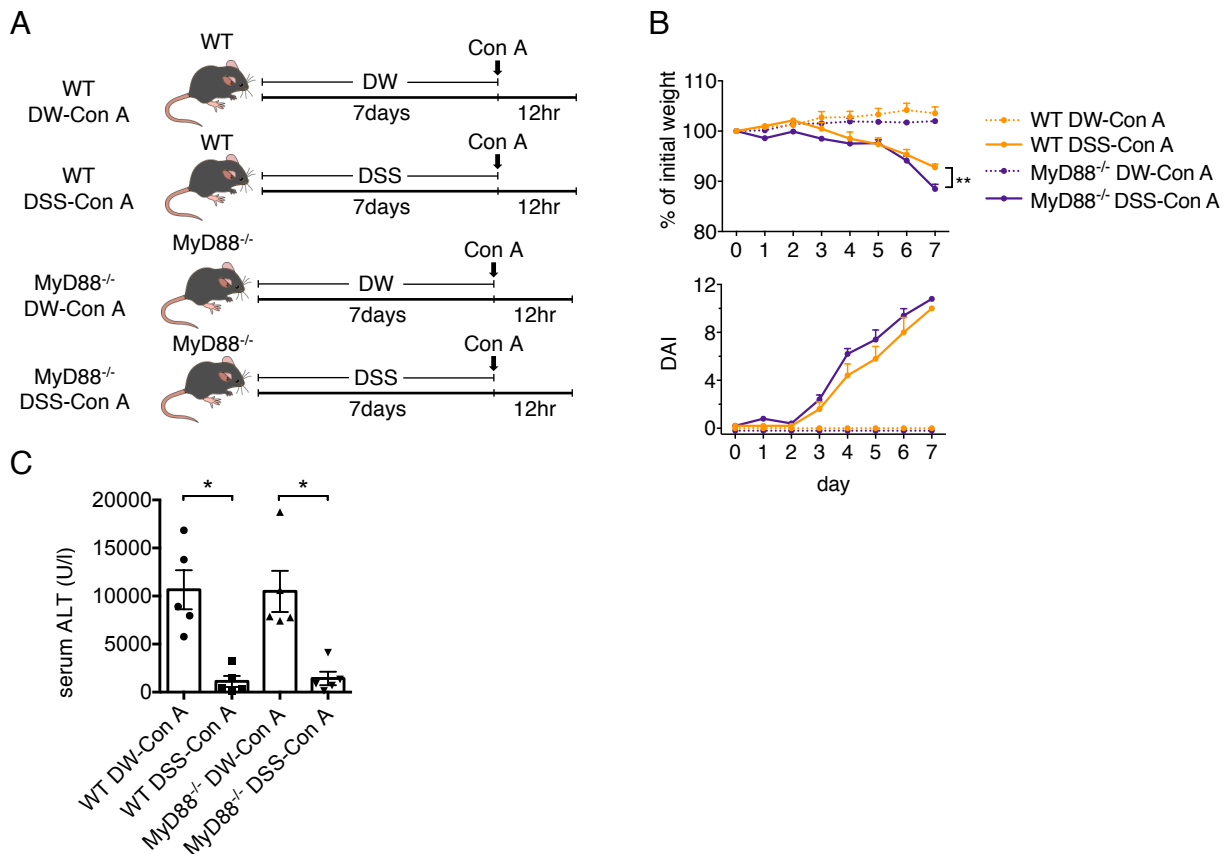

**Supplementary Figure 6. MyD88-deficient mice exhibit similar induction of immune tolerance in the liver following DSS-Con A treatment.** (A) Myd88<sup>-/-</sup> mice were either untreated or orally administrated 2.0% DSS, followed by Con A (20 mg/kg) administration. (B) Mean body weight and DAI on days 0 to 7 in mice from each experimental group ( $n = 5-7$ /group). (C) Serum ALT level in mice from each experimental group ( $n = 5$ /group). Data represent the mean  $\pm$  SEM. \* $P < 0.05$  according to one-way analysis of variance with Tukey's multiple-comparison correction.

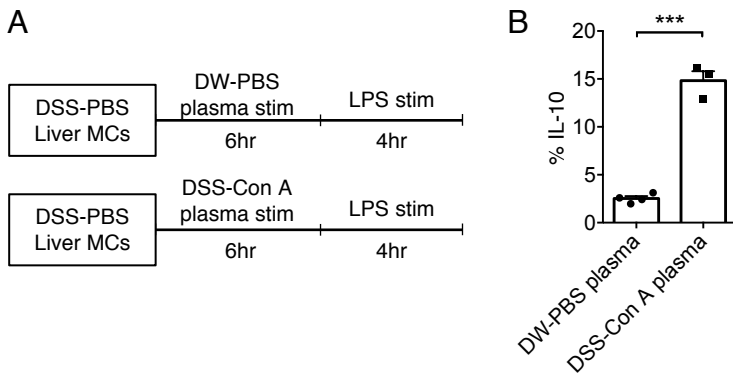

**Supplementary Figure 7. Plasma derived from DSS-Con A mice induced higher IL-10 production from DSS-PBS liver CD11b<sup>+</sup> cells.** (A) Liver MCs from DSS-PBS-treated mice were cultured with plasma derived from DW-PBS- or DSS-Con A-treated mice for 6 h, followed by 4-h LPS stimulation. (B) Percentage of IL-10<sup>+</sup> cells in liver CD11b<sup>+</sup> cells ( $n = 3-4$ /group). Data represent the mean  $\pm$  SEM. \*\*\* $P < 0.001$  according to a two-tailed Student's  $t$  test.
